# Supplementary material for: Berberine alleviates lipid metabolism disorders via inhibition of mitochondrial complex I in gut and liver
Source: PubMed Central journal article supplement (PMC8120465; doi:10.7150/ijbs.54604), 2021-04-12
Supplement: ijbsv17p1693s1.pdf [file ijbsv17p1693s1.pdf]

Table S1. Effects of BBR and ROT on serum biochemical indexes of diet-induced mice

|                     | NCD         | HFD          | HFD+BBR      | HFD+ROT      |
|---------------------|-------------|--------------|--------------|--------------|
| ALT (U/L)           | 40.17±2.12  | 90.33±25.51* | 51.17±7.78   | 49.17±15.08  |
| Creatinine (μmol/L) | 8.83±0.87   | 7.20±1.07    | 4.20±0.97    | 5.17±1.40    |
| HDL-C (mmol/L)      | 1.25±0.12   | 1.54±0.03    | 1.53±0.05    | 1.44±0.06    |
| LDL-C (mmol/L)      | 0.23±0.02   | 0.28±0.04    | 0.25±0.03    | 0.25±0.04    |
| Uric acid (mmol/L)  | 85.67±15.71 | 108.70±16.79 | 125.00±23.00 | 118.70±21.51 |

Data were expressed as means ± SEM (n = 6). \**P* < 0.05 vs. NCD.

Table S2. Effects of fecal transplantation on serum biochemical indexes of mice

|                       | HFD-MT       | BBR-MT       | ROT-MT       |
|-----------------------|--------------|--------------|--------------|
| ALT (U/L)             | 35.83±11.21  | 27.33±2.39   | 28.17±1.66   |
| Cholesterol (mmol/L)  | 3.12±0.39    | 3.23±0.32    | 3.30±0.28    |
| Creatinine (μmol/L)   | 9.33±2.19    | 7.50±0.67    | 7.50±0.76    |
| Glucose (mg/dL)       | 277.20±25.52 | 274.86±11.27 | 268.92±19.49 |
| HDL-C (mmol/L)        | 1.97±0.07    | 1.98±0.07    | 2.02±0.13    |
| LDL-C (mmol/L)        | 0.21±0.03    | 0.22±0.02    | 0.22±0.01    |
| Triglyceride (mmol/L) | 0.63±0.06    | 0.58±0.06    | 0.50±0.04    |
| Urea (mmol/L)         | 57.17±2.41   | 59.83±12.45  | 46.00±11.43  |

Data were expressed as means ± SEM (n = 6).
